# Supplementary material for: Wetting and recovery of nano-patterned surfaces beyond the classical picture
Source: Royal Society of Chemistry journal article supplement (doi:10.1039/c9nr05105h), 2019-01-01
Supplement: c9nr05105h1.pdf [file c9nr05105h1.pdf]

# Wetting and Recovery of Nano-Patterned Surfaces Beyond the Classical Picture

Sara Marchio<sup>a</sup>, Simone Meloni<sup>\*a,b</sup>, Alberto Giacomello<sup>†a</sup>, and Carlo Massimo Casciola<sup>a</sup>

<sup>a</sup>Dipartimento di Ingegneria Meccanica e Aerospaziale, Università di Roma *Sapienza*, Via  
Eudossiana 18, 00184 Roma, Italy

<sup>b</sup>Dipartimento di Scienze Chimiche e Farmaceutiche (DipSCF), Università degli Studi di  
Ferrara (Unife), Via Luigi Borsari 46, I-44121, Ferrara, Italy

August 20, 2019

---

<sup>\*</sup>simone.meloni@unife.it

<sup>†</sup>alberto.giacomello@uniroma1.it

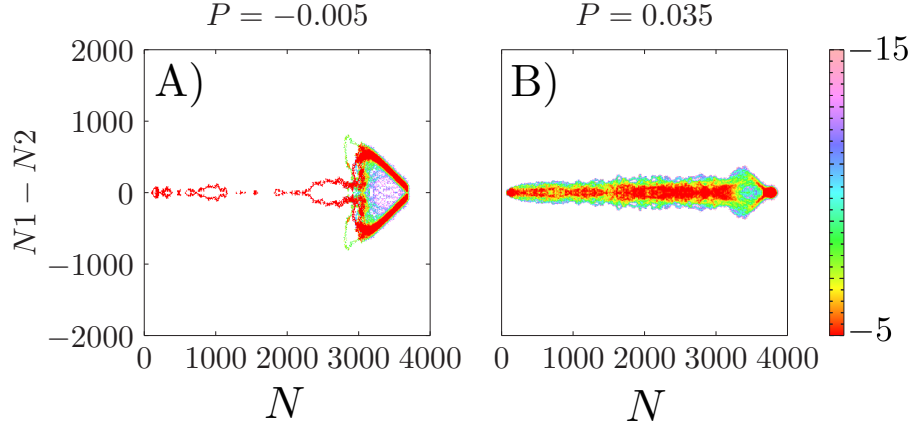

Figure SI1: Logarithmm of the joint probability density function  $\rho(\Delta N, N)$  along reactive trajectories in the system with the  $20 \times 20$  pore at pressures  $P = -0.005$  (A) and  $P = 0.035$  (B). With increasing pressure the intrusion mechanism passes from asymmetric (A) to symmetric (B).

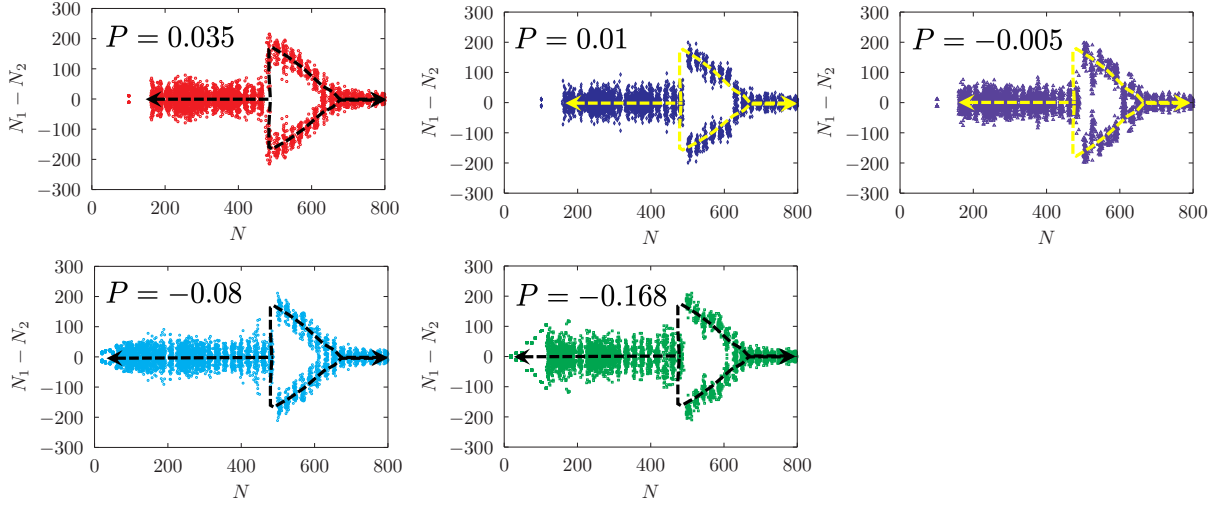

Figure SI2: Pairs of  $(\Delta N, N)$  values sampled in RMD simulations of the wetting/recovery process at  $P = 0.035$ ,  $0.01$ ,  $-0.005$ ,  $-0.08$  and  $-0.168$ . The dashed lines, introduced to help the reader to follow the wetting/recovery path, is obtained by connecting the average value of  $\Delta N$  at each  $N$ ,  $\langle \Delta N \rangle_N$ ; in the region in which the graph is split in the two parts ( $N > 450$ )  $\langle \Delta N \rangle_N$  is computed within the domain of each mode. Independently on the pressure, in the early part of the wetting  $\Delta N$  values are concentrated about 0. At  $N \sim 450$  one observes a sharp change, with sizably negative and positive  $\Delta N$  values. The recovery path is just the opposite of the wetting one.

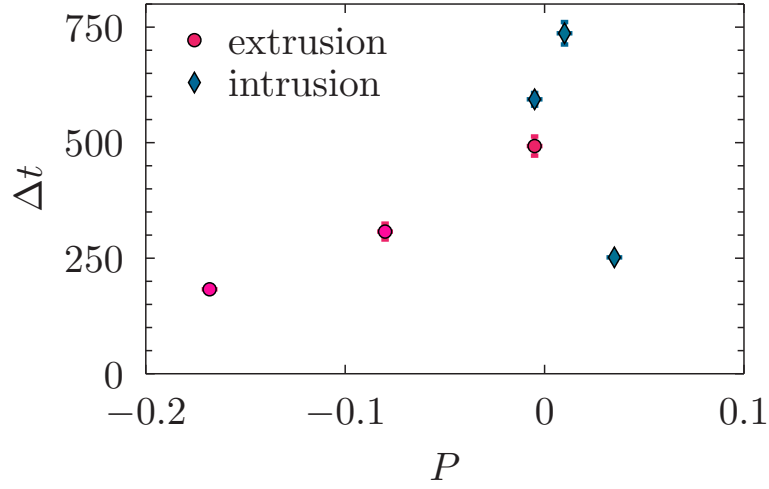

Figure SI3: Duration of reactive trajectories  $\Delta t$  vs liquid pressure  $P$  in LJ units. These results show that the increase of the wetting and recovery driving force, increase and decrease of the liquid pressure, respectively, shorten the duration of reactive trajectories. Nevertheless, the variation of the duration of reactive trajectories, which change of a factor 2 – 3, is much shorter than the variation of the transition time  $\tau$ , which changes of 27 orders of magnitude. Indeed, as explained in the main text, the origin of the variation of the transition time is not the duration of reactive trajectories but the frequency with which attempted transition from the Cassie-Baxter to the Wenzel state and *vice versa* are successful.
